# Supplementary material for: Filamin A regulates platelet shape change and contractile force generation via phosphorylation of the myosin light chain
Source: PubMed Central journal article supplement — Biochem J. 2024 Oct 7;481(20):1395–410. doi: 10.1042/BCJ20240114 (PMC11555712; doi:10.1042/bcj20240114), 2024-10-07
Supplement: BCJ-481-1395-s1.pdf [file BCJ-481-1395-s1.pdf]

## Supplemental Figure S1

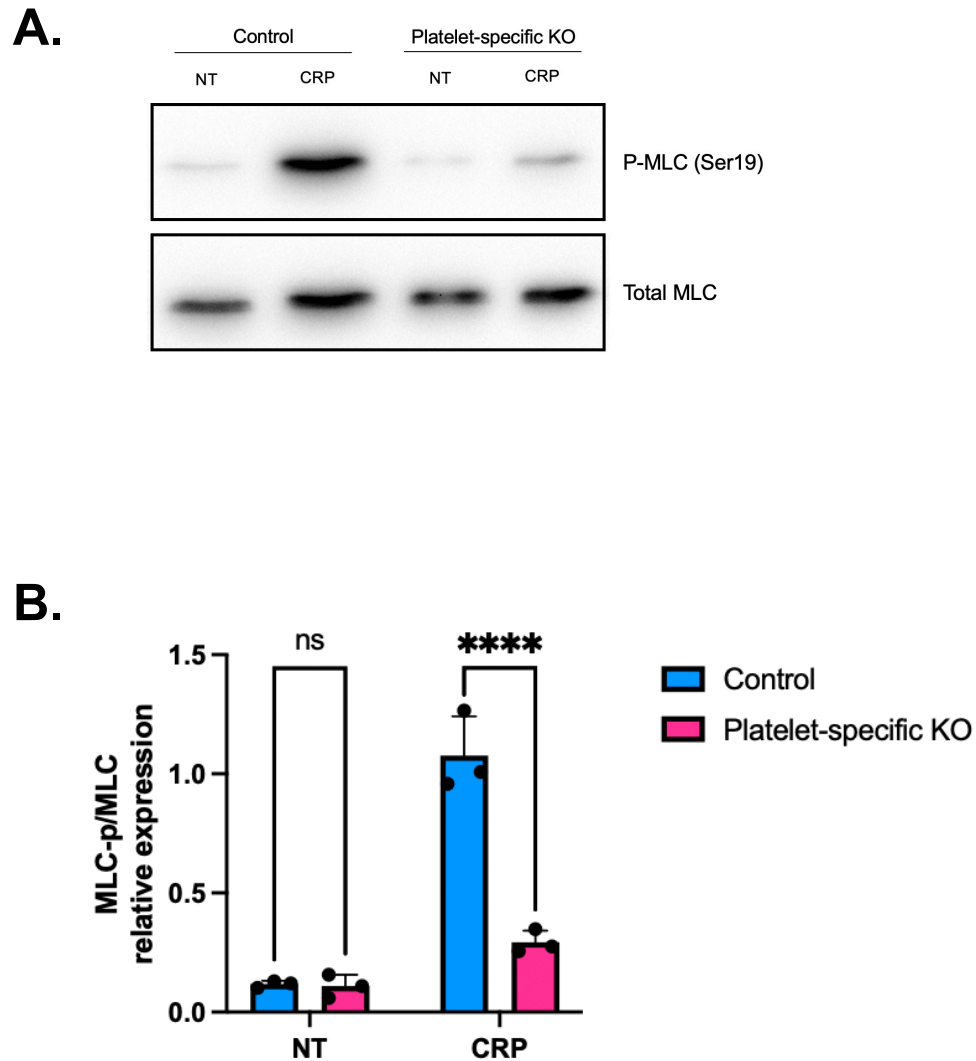

**Supplemental Figure S1. A.** Immunoblot depicts MLC phosphorylation at Ser19 in floxed platelets (control) and FLNA-null platelets (platelet-specific KO) after treatment with the GPVI agonist collagen-related peptide (CRP) at 1  $\mu\text{g}/\text{mL}$  for 5 minutes. Total MLC is shown as a loading control. **B.** Bar graph represents the densitometry quantification of the expression of p-MLC2 (Ser19) relative to total MLC proteins in floxed (control, blue bars) and FLNA-deficient (platelet-specific KO, pink bars) platelets in response to CRP. Data are mean  $\pm$  SEM, analyzed by two-way ANOVA and Tukey post-hoc multiple comparison tests, and represent a minimum of 3 independent experiments. \*\*\*\*,  $p < 0.0001$ , based on two-way ANOVA and Tukey post-hoc multiple comparison tests. NT=no treatment.

## Supplemental Figure S2

**A.**

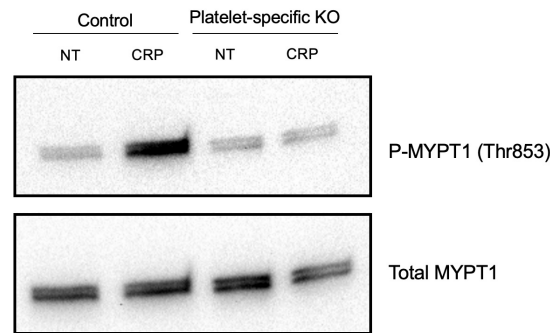

**B.**

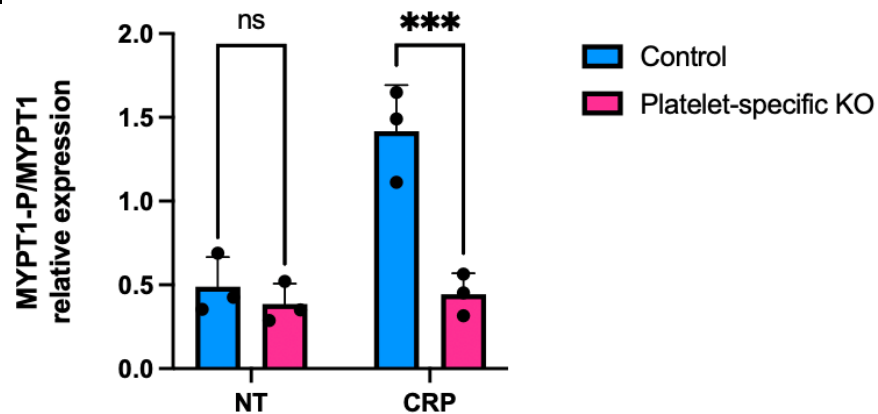

**Supplemental Figure S2. A.** Immunoblot depicts MYPT1 phosphorylated at Thr853 in floxed platelets (control) and FLNA-null platelets (platelet-specific KO) after stimulation with the GPVI agonist collagen-related peptide (CRP) at 1  $\mu\text{g}/\text{mL}$  for 5 minutes. Total MYPT1 is shown as a loading control. **B.** Bar graph represents the densitometry quantification of the expression of p-MYPT1 (Thr853) relative to total MYPT1 in floxed platelets (control, blue bars) and FLNA-null platelets (platelet-specific KO, pink bars) in response to CRP treatment. Data are mean  $\pm$  SEM, analyzed by two-way ANOVA and Tukey post-hoc multiple comparison tests, and represent a minimum of 3 independent. \*\*\*,  $p < 0.001$ , based on two-way ANOVA and Tukey post-hoc multiple comparison tests. NT=no treatment.
